# Supplementary material
Source: PubMed Central journal article supplement (PMC5315667)
Supplement: NIHMS829807-supplement-Supp_Table_S1-6.pdf [file NIHMS829807-supplement-Supp_Table_S1-6.pdf]

## Supporting information - Tables

**Table S1:** *EG16* expression constructs screened for protein production

| <b>Construct</b>             | <b>Production result</b>                                               |
|------------------------------|------------------------------------------------------------------------|
| SmEG16                       | Strong production into inclusion bodies                                |
| PpEG16                       | Strong production into inclusion bodies                                |
| PpEG16-sfGFP                 | Weak production into inclusion bodies                                  |
| PpEG16-SUMO                  | Strong production into inclusion bodies                                |
| BdEG16                       | Strong production into inclusion bodies                                |
| BdEG16-sfGFP                 | Soluble-aggregate production, precipitation after removal of sfGFP tag |
| BdEG16-SUMO                  | Soluble-aggregate production, precipitation after removal of SUMO tag  |
| VvEG16                       | Strong soluble production                                              |
| VvEG16-sfGFP                 | Slow soluble production                                                |
| VvEG16-SUMO                  | Strong soluble production                                              |
| VvEG16( $\Delta$ V152)       | Strong soluble production                                              |
| VvEG16( $\Delta$ V152)-sfGFP | Weak soluble production                                                |
| VvEG16( $\Delta$ V152)-SUMO  | Strong soluble production                                              |
| VvEG16( $\Delta$ V152,E89A)  | Strong soluble production                                              |
| VvEG16(E89A)                 | Strong soluble production                                              |

**Table S2:** <sup>18</sup>O-labeling of each product from cellooligosaccharide hydrolysis.

| <b>Substrate</b><br>Product | <b>% <sup>18</sup>O Labelled<sup>a</sup></b> | <b>Error</b> |
|-----------------------------|----------------------------------------------|--------------|
| <b>Cellotriose</b>          |                                              |              |
| Glc                         | 0.4                                          | 1.4          |
| GG                          | 35.2                                         | 2.8          |
| <b>Cellotetraose</b>        |                                              |              |
| Glc                         | 3.2                                          | 2.8          |
| GG                          | 51.2                                         | 0.9          |
| GGG                         | 89.4                                         | 1.6          |
| <b>Cellopentaose</b>        |                                              |              |
| GG                          | 17.6                                         | 2.6          |
| GGG                         | 79.0                                         | 0.8          |
| <b>Cellohexaose</b>         |                                              |              |
| GG                          | 15.6                                         | 2.6          |
| GGG                         | 50.7                                         | 0.8          |
| GGGG                        | 80.5                                         | 1.1          |

<sup>a</sup>Calculated as  $\%L = ((I_{M+2}/(I_{M+2}+I_M)) - (I_{N+2}/(I_{N+2}+I_N))) / x_{18O}$ , where  $x_{18O}$  is the mole fraction of water which contains <sup>18</sup>O, I is the integration of an MS peak, <sub>M</sub> indicates base peak with <sup>18</sup>O water, <sub>N</sub> indicates base peak with <sup>16</sup>O water and <sub>M+2</sub> and <sub>N+2</sub> indicate the peak found 2 Da heavier than the each base peak.  $x_{18O}$  was estimated to be 0.85 for this experiment.

**Table S3:** X-ray diffraction data statistics.

|                                                     | <b>VvEG16(<math>\Delta</math>V152,E89A):<br/>GGGG complex</b> | <b>VvEG16(<math>\Delta</math>V152,E89A):<br/>bMLGO complex</b> | <b>VvEG16(<math>\Delta</math>V152,E89A):<br/>tXyGO complex</b> | <b>VvEG16(<math>\Delta</math>V152,C22S,<br/>C188S): tXyGO complex</b> |
|-----------------------------------------------------|---------------------------------------------------------------|----------------------------------------------------------------|----------------------------------------------------------------|-----------------------------------------------------------------------|
| <b>PDB Code</b>                                     | <b>5DZE</b>                                                   | <b>5DZF</b>                                                    | <b>5DZG</b>                                                    | <b>5SV8</b>                                                           |
|                                                     | <b>DATA COLLECTION</b>                                        |                                                                |                                                                |                                                                       |
| Wavelength (Å)                                      | 0.9795                                                        | 0.8266                                                         | 1.0332                                                         | 1.0332                                                                |
| Space group                                         | P2 <sub>1</sub> 2 <sub>1</sub> 2 <sub>1</sub>                 | P4 <sub>3</sub> 2 <sub>1</sub> 2                               | P2 <sub>1</sub> 2 <sub>1</sub> 2 <sub>1</sub>                  | P2 <sub>1</sub> 2 <sub>1</sub> 2 <sub>1</sub>                         |
| Cell dimensions                                     |                                                               |                                                                |                                                                |                                                                       |
| <i>a</i> , <i>b</i> , <i>c</i> , (Å)                | 45.15, 52.02, 83.06                                           | 74.33, 74.33, 149.28                                           | 41.3, 79.0, 132.6                                              | 46.2, 51.9, 82.6                                                      |
| $\alpha$ , $\beta$ , $\gamma$ (°)                   | 90, 90, 90                                                    | 90, 90, 90                                                     | 90, 90, 90                                                     | 90, 90, 90                                                            |
| Resolution, Å                                       | 44.09-0.97 (1.00-0.97) <sup>b</sup>                           | 42.97-1.55 (1.69-1.65)                                         | 39.41-1.79 (1.83-1.79)                                         | 27.54-1.588 (1.62-1.59)                                               |
| <i>R</i> <sub>merge</sub> <sup>a</sup>              | 0.065 (0.901)                                                 | 0.20 (1.25)                                                    | 0.097 (0.317)                                                  | 0.19 (0.69)                                                           |
| <i>I</i> / $\sigma$ ( <i>I</i> )                    | 16.34 (1.25)                                                  | 10.85 (1.43)                                                   | 12.2 (3.6)                                                     | 12.2 (2.8)                                                            |
| Completeness, %                                     | 95.6 (69.0)                                                   | 100 (97.0)                                                     | 98.2 (78.3)                                                    | 99.5 (91.2)                                                           |
| Redundancy                                          | 6                                                             | 12.1                                                           | 5.9                                                            | 6.2                                                                   |
|                                                     | <b>REFINEMENT</b>                                             |                                                                |                                                                |                                                                       |
| No. of reflections:                                 |                                                               |                                                                |                                                                |                                                                       |
| working, test                                       | 106175, 5588                                                  | 48580, 2558                                                    | 38822, 2056                                                    | 27417, 1382                                                           |
| <i>R</i> -factor/free <i>R</i> -factor <sup>c</sup> | 0.136/0.150 (0.350/0.366)                                     | 0.155/0.200<br>(0.304/0.376)                                   | 0.171/0.217 (0.225/0.285)                                      | 0.152/0.179<br>(0.220/0.259)                                          |
| No. of refined atoms                                |                                                               |                                                                |                                                                |                                                                       |
| Protein                                             | 3361                                                          | 3208                                                           | 3092                                                           | 3113                                                                  |
| Ligand                                              | 114                                                           | 146                                                            | 215                                                            | 63                                                                    |
| Solvent                                             | 284                                                           | 463                                                            | 401                                                            | 228                                                                   |
| <i>B</i> -factors                                   |                                                               |                                                                |                                                                |                                                                       |
| Protein                                             | 9.8                                                           | 20.3                                                           | 20.9                                                           | 10.6                                                                  |
| Ligand                                              | 13.0                                                          | 21.0                                                           | 28                                                             | 18.4                                                                  |
| Solvent                                             | 23.0                                                          | 35.2                                                           | 32.4                                                           | 21.9                                                                  |
| RMSD                                                |                                                               |                                                                |                                                                |                                                                       |
| Bond lengths, Å                                     | 0.009                                                         | 0.008                                                          | 0.011                                                          | 0.010                                                                 |
| Bond angles, °                                      | 1.53                                                          | 1.25                                                           | 1.50                                                           | 1.39                                                                  |
| Ramachandran Plot:                                  |                                                               |                                                                |                                                                |                                                                       |
| Favoured, %                                         | 96.6                                                          | 97.3                                                           | 97.5                                                           | 98.0                                                                  |
| Allowed, %                                          | 2.3                                                           | 2.7                                                            | 2.5                                                            | 2.0                                                                   |
| Disallowed, %                                       | 1.1                                                           | 0                                                              | 0                                                              | 0                                                                     |

<sup>a</sup>  $R_{\text{merge}} = \frac{\sum_h \sum_i |I_i(h) - \langle I(h) \rangle|}{\sum_h \sum_i I_i(h)}$ , where  $I_i(h)$  and  $\langle I(h) \rangle$  are the *i*th and mean measurement of the intensity of reflection *h*.

<sup>b</sup> Figures in parentheses throughout the table indicate the values for the outer shells of the data.

<sup>c</sup>  $R = \frac{\sum |F_p^{\text{obs}} - F_p^{\text{calc}}|}{\sum F_p^{\text{obs}}}$ , where  $F_p^{\text{obs}}$  and  $F_p^{\text{calc}}$  are the observed and calculated structure factor amplitudes, respectively.

**Table S4:** Privateer validation results.

| Residue Name                                                            | Conformation                | Average B-factor | RSCC <sup>1</sup> |
|-------------------------------------------------------------------------|-----------------------------|------------------|-------------------|
| <b>VvEG16(<math>\Delta</math>V152,E89A): GGGG complex (5DZE)</b>        |                             |                  |                   |
| GLC-1                                                                   | <sup>4</sup> C <sub>1</sub> | 8.4              | 0.94              |
| BGC-1                                                                   | <sup>4</sup> C <sub>1</sub> | 6.5              | 0.96              |
| BGC-2                                                                   | <sup>4</sup> C <sub>1</sub> | 8.4              | 0.95              |
| BGC-3                                                                   | <sup>4</sup> C <sub>1</sub> | 43.0             | 0.71              |
| BGC-4                                                                   | <sup>4</sup> C <sub>1</sub> | 21.7             | 0.66              |
| <b>VvEG16(<math>\Delta</math>V152,E89A): bMLGO complex (5DZF)</b>       |                             |                  |                   |
| GLC-1                                                                   | <sup>4</sup> C <sub>1</sub> | 16.4             | 0.95              |
| GLC-2                                                                   | <sup>4</sup> C <sub>1</sub> | 16.8             | 0.93              |
| BGC-1                                                                   | <sup>4</sup> C <sub>1</sub> | 13.8             | 0.96              |
| BGC-2                                                                   | <sup>4</sup> C <sub>1</sub> | 16.9             | 0.94              |
| BGC-3                                                                   | <sup>4</sup> C <sub>1</sub> | 24.5             | 0.92              |
| BGC-4                                                                   | <sup>4</sup> C <sub>1</sub> | 24.8             | 0.92              |
| BGC-5                                                                   | <sup>4</sup> C <sub>1</sub> | 25.8             | 0.90              |
| BGC-6                                                                   | <sup>4</sup> C <sub>1</sub> | 21.7             | 0.95              |
| BGC-7                                                                   | <sup>4</sup> C <sub>1</sub> | 16.6             | 0.95              |
| BGC-8                                                                   | <sup>4</sup> C <sub>1</sub> | 15.0             | 0.94              |
| BGC-9                                                                   | <sup>4</sup> C <sub>1</sub> | 19.4             | 0.94              |
| BGC-10                                                                  | <sup>4</sup> C <sub>1</sub> | 32.7             | 0.87              |
| BGC-11                                                                  | <sup>4</sup> C <sub>1</sub> | 28.6             | 0.77              |
| <b>VvEG16(<math>\Delta</math>V152,E89A): tXyGO complex (5DZG)</b>       |                             |                  |                   |
| GLC-1                                                                   | <sup>4</sup> C <sub>1</sub> | 15.4             | 0.90              |
| GLC-2                                                                   | <sup>4</sup> C <sub>1</sub> | 19.9             | 0.88              |
| BGC-1                                                                   | <sup>4</sup> C <sub>1</sub> | 17.3             | 0.94              |
| BGC-2                                                                   | <sup>4</sup> C <sub>1</sub> | 19.7             | 0.94              |
| BGC-3                                                                   | <sup>4</sup> C <sub>1</sub> | 27.3             | 0.90              |
| BGC-4                                                                   | <sup>4</sup> C <sub>1</sub> | 32.8             | 0.79              |
| BGC-5                                                                   | <sup>4</sup> C <sub>1</sub> | 28.5             | 0.87              |
| BGC-6                                                                   | <sup>4</sup> C <sub>1</sub> | 23.3             | 0.90              |
| BGC-7                                                                   | <sup>4</sup> C <sub>1</sub> | 18.7             | 0.87              |
| BGC-8                                                                   | <sup>4</sup> C <sub>1</sub> | 15.7             | 0.92              |
| BGC-9                                                                   | <sup>4</sup> C <sub>1</sub> | 27.5             | 0.88              |
| BGC-10                                                                  | <sup>4</sup> C <sub>1</sub> | 19.9             | 0.93              |
| XYS-1                                                                   | <sup>4</sup> C <sub>1</sub> | 33.3             | 0.83              |
| XYS-2                                                                   | <sup>4</sup> C <sub>1</sub> | 26.4             | 0.83              |
| XYS-3                                                                   | <sup>2</sup> E              | 44.3             | 0.71              |
| XYS-4                                                                   | <sup>4</sup> C <sub>1</sub> | 42.1             | 0.80              |
| XYS-5                                                                   | <sup>0</sup> S <sub>2</sub> | 38.1             | 0.79              |
| XYS-6                                                                   | <sup>2</sup> E              | 37.1             | 0.80              |
| XYS-7                                                                   | <sup>4</sup> C <sub>1</sub> | 26.5             | 0.86              |
| XYS-8                                                                   | <sup>2</sup> S <sub>0</sub> | 34.7             | 0.78              |
| XYS-9                                                                   | <sup>4</sup> C <sub>1</sub> | 35.5             | 0.83              |
| <b>VvEG16(<math>\Delta</math>V152,C22S,C188S): tXyGO complex (5SV8)</b> |                             |                  |                   |
| BGC-1                                                                   | <sup>4</sup> C <sub>1</sub> | 7.9              | 0.93              |
| BGC-2                                                                   | <sup>4</sup> C <sub>1</sub> | 9.1              | 0.89              |

|       |           |      |      |
|-------|-----------|------|------|
| BGC-3 | ${}^4C_1$ | 13.9 | 0.87 |
| BGC-4 | ${}^4C_1$ | 19.7 | 0.84 |
| XYS-1 | ${}^4C_1$ | 33.6 | 0.66 |
| XYS-2 | ${}^4C_1$ | 31.7 | 0.75 |

---

<sup>3</sup>RSCC, short for Real Space Correlation Coefficient, measures the agreement between model and positive omit density. A RSCC below 0.8 is typically considered poor.

**Table S5:** Sequences used for generation of the GH16 phylogenetic tree.

| Activity                   | GenBank Accession Codes                                                    |
|----------------------------|----------------------------------------------------------------------------|
| GH7 Cellulase              | AAX28897.1, AAA65586.1, BAA09786.1, AEO58196.1, ABY56790.1                 |
| XTH                        | ABL75361.1, AAC09388.1, ACS13756.1, CAA48324.1, AAD31572.1                 |
| EG16                       | XM_002273939.3, XM_002301283.2, NM_001156874.1, AK356496.1, XM_002970606.1 |
| Licheninase                | CAA39426.1, AAB05759.1, CAA40547.1, AFX61538.1, AAA24896.1                 |
| Laminarinase               | AAC38290.1, AAC44371.1, BAE54302.1, AAD35118.1, CAZ95067.1                 |
| Chitin<br>Transglycosylase | AAB65002.1, EAL03096.1, EAL02960.1, EAL01616.1, CAA67525.1                 |
| Agarase                    | BAC99022.1, BAD29947.1, EDY95404.1, AAF21821.1, CAZ98378.1                 |
| Porphyranase               | CBM41184.1, CBM41183.1, CBM41185.1, CBM41182.1, EDY95423.1                 |
| Kappa-<br>Carrageenase     | CAA50624.1, AGS43006.1, CAZ94309.1, BAJ61957.1, ADD92366.1                 |
